# Supplementary material for: Lipoarabinomannan in sputum to detect bacterial load and treatment response in patients with pulmonary tuberculosis: Analytic validation and evaluation in two cohorts
Source: PLoS Med. 2019 Apr 12;16(4):e1002780. doi: 10.1371/journal.pmed.1002780 (PMC6461223; doi:10.1371/journal.pmed.1002780)
Supplement: S5 Data — (XLSX) [file pmed.1002780.s009.xlsx]

## Sheet: Sheet1
Substance	Measured value	Ratio to the reference (%)	Judgment
	(pg/mL)
Reference (no addition: first extraction)	520.1	-	-
Reference (no addition: second extraction)	485.5	-	-
Anti-TB drugs
Isoniazid	460.4	88.5	Conformed
Rifampicin	640.9	123.2	Conformed
Streptomycin sulfate	643.3	123.7	Conformed
Ethambutol	568.6	109.3	Conformed
Ethionamide	638.8	122.8	Conformed
Pyrazinamide	596.9	114.8	Conformed
Kanamycin sulfate	462.4	88.9	Conformed
Enviomycin sulfate	598.5	115.1	Conformed
Cycloserine	635.1	122.1	Conformed
Anti-pneumonia drugs
Substance	Measured value	Ratio to the reference (%)	Judgment
	(pg/mL)
Azithromycin	547	105.2	Conformed
Clarithromycin	594.8	114.4	Conformed
Cefditoren pivoxil	531.1	102.1	Conformed
Minocycline hydrochloride	626.9	120.5	Conformed
Imipenem-cilastatin sodium	596.9	114.8	Conformed
Levofloxacin	502.2	96.6	Conformed
Povidone-iodine	562.9	108.2	Conformed
Betamethasone sodium phosphate-fradiomycin sulfate	565.8	108.8	Conformed
Potassium clavulanate-amoxicillin hydrate	532.7	102.4	Conformed
Anti-HIV drugs
Substance	Measured value	Ratio to the reference (%)	Judgment
	(pg/mL)
Lamivudine	555.5	106.8	Conformed
Emtricitabine	538	103.4	Conformed
Abacavir sulfate	553.1	106.3	Conformed
Tenofovir disoproxil fumarate	556.8	107.1	Conformed
Efavirenz	409.2	78.7	Conformed
Etravirine	555.1	106.7	Conformed
Rilpivirine	535.5	103	Conformed
Atazanavir sulfate	532.3	102.3	Conformed
Maraviroc	537.6	103.4	Conformed
Other
Mucin	592.4	113.9	Conformed
Serum	503.8	103.8	Conformed
Conformed	Within ±25% of the reference value
